# Supplementary material for: Synthesis of anionic ionic liquids@TpBd-(SO3)2 for the selective adsorption of cationic dyes with superior capacity
Source: Royal Society of Chemistry journal article supplement (doi:10.1039/c9ra10035k), 2020-01-01
Supplement: c9ra10035k1.pdf [file c9ra10035k1.pdf]

## Supporting Information

### **Synthesis of anionic Ionic Liquids@Covalent Organic Materials for selective adsorption of cationic dye with superior capacity**

Meng Dang<sup>a</sup>, Qi-Liang Deng<sup>a</sup>, Yan-Yan Tian<sup>a</sup>, Chang-Liu<sup>a</sup>, Hai-Peng Shi<sup>a</sup>, Guo-Zhen Fang<sup>a\*</sup>, and Shuo Wang<sup>a,b\*</sup>

<sup>a</sup>State Key Laboratory of Food Nutrition and Safety, Ministry of Education, Tianjin University of Science & Technology, Tianjin, 300457, China.

<sup>b</sup>Beijing Advanced Innovation Center for Food Nutrition and Human Health, Beijing Technology & Business University (BTBU), Beijing, 100048, China.

## **S1. General information**

### **1. Materials and reagents**

All chemicals and reagents used were at least of analytical grade. Ultrapure water was prepared in doubly deionized water (DDW, 18.2 MU cm<sup>-1</sup>) from a Millipore water purification system (Millipore, Billerica, MA, USA). 1,3,5-Triformylphloroglucinol (Tp) was purchased from Yuhao Chemical Technology Co. Ltd. (Hangzhou, China). 2,5-Diaminobenzenesulfonic acid (Pa), and 2,2'-benzidinedisulfonic acid (Bd) were purchased from Macklin Biochemical Co. Ltd. (Shanghai, China). Imidazole, ethanol, methanol, N,N-dimethylformamide (DMF), 1,4-dioxane, mesitylene, phosphorous acid (H<sub>3</sub>PO<sub>4</sub>), disodium phosphate dodecahydrate (NaH<sub>2</sub>PO<sub>4</sub>·12H<sub>2</sub>O), sodium dihydrogen phosphate, (Na<sub>2</sub>HPO<sub>4</sub>·2H<sub>2</sub>O), hydrochloric acid (HCl), sodium hydroxide (NaOH) and acetonitrile (ACN) were purchased from Sinopharm Chemical Reagent Co. Ltd. (Shanghai, China). 1-Phenylimidazole was obtained from TCI (Shanghai, China) and 1-butylimidazole was obtained from Alfa Aesar (Shanghai, China), respectively. Methylene Blue (MB), methyl orange (MO), reactive brilliant red K-2BP (RBR), basic red 5 (BR), crystal violet (CV), and basic orange 2 (BO) were purchased from Sanjiang Chemical Technology Co. Ltd. (Tianjin, China). Nile red (NR) and calcein (CA) were purchased from Yuanye Biotechnology Co. Ltd. (Shanghai, China). Auramine O (AO) was obtained from Adamas Reagent Co. Ltd. (Shanghai, China). Azure A (AZA), Azure B (AZB) and Azure C (AZC) were purchased from Amresco Co. Ltd. (USA). Congo red (CR) and bismarck brown R (BRR) were obtained from J&K Scientific Ltd. (Beijing, China). Arginine was obtained from Sigma-Aldrich (St., Louis, MO).

## S2. Figures and Tables

**Table S1.** Cationic dye molecules and their properties used in HPLC-MS analyze

| Analyte        | Molecular mass | Parention (m/z) | Fragment ion (m/z)<br>* | Cone voltage (V) | Collision energy (eV) | Charge   |
|----------------|----------------|-----------------|-------------------------|------------------|-----------------------|----------|
| Methylene Blue | 373.9          | 284.2           | 268.1                   | 120              | 40                    | Positive |
|                |                |                 | 252.2                   | 120              | 50                    |          |
| Azure A        | 291.8          | 255.8           | 213.7                   | 130              | 30                    |          |
|                |                |                 | 198.8                   | 130              | 40                    |          |
| Azure B        | 305.8          | 269.8           | 253.7                   | 130              | 28                    |          |
|                |                |                 | 227.8                   | 130              | 30                    |          |
| Azure C        | 277.8          | 241.9           | 226.8                   | 130              | 33                    |          |
|                |                |                 | 199.8                   | 130              | 26                    |          |
| Auramine O     | 303.8          | 268             | 147                     | 130              | 29                    |          |
|                |                |                 | 131                     | 130              | 55                    |          |
|                |                |                 | 107                     | 130              | 33                    |          |
| Crystal Violet | 373.5          | 372             | 356.1                   | 130              | 40                    |          |
|                |                |                 | 340                     | 130              | 51                    |          |
| Basic Red 5    | 288.8          | 253.1           | 237.1                   | 135              | 40                    |          |
|                |                |                 | 222                     | 135              | 50                    |          |
|                |                |                 | 210.1                   | 135              | 33                    |          |
| Basic Orange 2 | 248.7          | 213.4           | 120.2                   | 120              | 15                    |          |
|                |                |                 | 77.2                    | 120              | 15                    |          |

\* Quantitative ion.

**Table S2.** Fractional atomic coordinates for the unit cell of TpPa-SO<sub>3</sub>

| TpPa-SO <sub>3</sub>                                            |          |          |     |
|-----------------------------------------------------------------|----------|----------|-----|
| Space group P 1                                                 |          |          |     |
| a = 22.8 Å, b = 22.77 Å, c = 4.52 Å, α = 90°, β = 90°, γ = 120° |          |          |     |
| atom                                                            | x        | y        | z   |
| C                                                               | 0.01939  | 0.50187  | 0.5 |
| C                                                               | 0.13839  | 0.5297   | 0.5 |
| C                                                               | 0.20854  | 0.57990  | 0.5 |
| C                                                               | 0.23264  | 0.65104  | 0.5 |
| C                                                               | 0.25782  | 0.55190  | 0.5 |
| N                                                               | 0.08742  | 0.54403  | 0.5 |
| O                                                               | 0.19149  | 0.67203  | 0.5 |
| O                                                               | 0.23768  | 0.49668  | 0.5 |
| C                                                               | 0.30249  | 0.70059  | 0.5 |
| C                                                               | 0.32845  | 0.60643  | 0.5 |
| C                                                               | 0.34923  | 0.6768   | 0.5 |
| O                                                               | 0.411162 | 0.7191   | 0.5 |
| C                                                               | 0.32227  | 0.7707   | 0.5 |
| N                                                               | 0.38593  | 0.82389  | 0.5 |
| C                                                               | 0.40856  | 0.89167  | 0.5 |
| C                                                               | 0.37479  | 0.92767  | 0.5 |
| C                                                               | 0.47483  | 0.92911  | 0.5 |
| S                                                               | 0.296207 | 0.89281  | 0.5 |
| O                                                               | 0.29235  | 0.94741  | 0.5 |
| O                                                               | 0.28291  | 0.83109  | 0.5 |
| O                                                               | 0.23157  | 0.86508  | 0.5 |
| H                                                               | 0.006561 | 0.58192  | 0.5 |
| H                                                               | 0.10745  | 0.409597 | 0.5 |
| H                                                               | 0.10139  | 0.59135  | 0.5 |
| H                                                               | 0.12483  | 0.47965  | 0.5 |
| H                                                               | 0.28553  | 0.78279  | 0.5 |
| H                                                               | 0.42066  | 0.81197  | 0.5 |
| H                                                               | 0.500075 | 0.90501  | 0.5 |

**Table S3** Comparison of element analyses of C, N, H, and S

| Materials                                  | C (%) | N (%) | H (%) | S (%) |
|--------------------------------------------|-------|-------|-------|-------|
| TpPa-SO <sub>3</sub>                       | 42.21 | 11.58 | 5.35  | 13.35 |
| TpBd-(SO <sub>3</sub> ) <sub>2</sub>       | 41.93 | 8.60  | 5.15  | 10.04 |
| TpCR-(SO <sub>3</sub> ) <sub>2</sub>       | 34.67 | 6.23  | 3.06  | 8.05  |
| ImI@TpBd-(SO <sub>3</sub> ) <sub>2</sub>   | 46.59 | 8.66  | 6.08  | 8.85  |
| BuImI@TpBd-(SO <sub>3</sub> ) <sub>2</sub> | 42.94 | 8.62  | 5.69  | 9.97  |
| PhImI@TpBd-(SO <sub>3</sub> ) <sub>2</sub> | 43.1  | 8.28  | 5.77  | 10.89 |

**Table S4** Comparison of surface area and pore volume of the as-prepared materials

| Materials                                   | Surface area<br>(m <sup>2</sup> g <sup>-1</sup> ) | Pore volume<br>(cm <sup>3</sup> g <sup>-1</sup> ) | Pore size (nm) |
|---------------------------------------------|---------------------------------------------------|---------------------------------------------------|----------------|
| TpPa-SO <sub>3</sub>                        | 70.8                                              | 0.1709                                            | 1.7, 2.9       |
| TpBd-(SO <sub>3</sub> ) <sub>2</sub>        | 60.5                                              | 0.1711                                            | 9.3            |
| TpCR-(SO <sub>3</sub> ) <sub>2</sub>        | 9.6                                               | 0.0190                                            | 2.9            |
| ImI@TpBd-(SO <sub>3</sub> ) <sub>2</sub>    | 61.8                                              | 0.1722                                            | 14.5, 23.8     |
| BuImI@TpBd-(SO <sub>3</sub> ) <sub>2</sub>  | 33.7                                              | 0.1245                                            | 2.3, 14, 21    |
| PheImI@TpBd-(SO <sub>3</sub> ) <sub>2</sub> | 40.2                                              | 0.1125                                            | 6.8            |

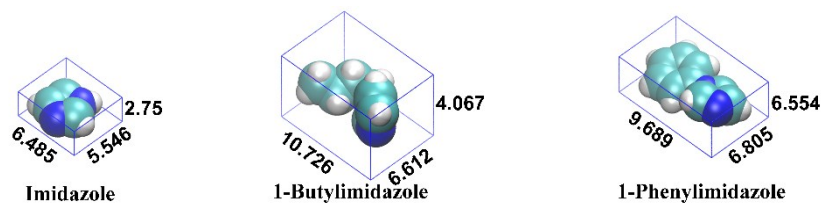

**Fig. S1** The molecular models of imidazole derivatives were displayed in the Bondi van der waals (VDW) style (blue, carbon; white, hydrogen; blue, nitrogen) calculated by Multiwfn; Imidazole with a size of  $6.485 \times 5.546 \times 2.75$  Å, 1-buthylimidazole with a size of  $10.726 \times 6.612 \times 4.067$  Å, and 1-phenylimidazole with a size of  $9.689 \times 6.805 \times 6.554$  Å

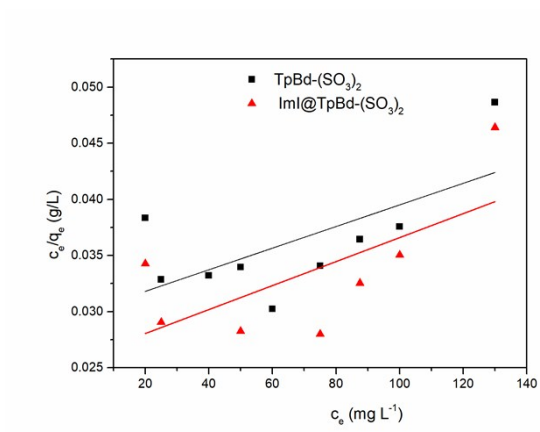

**Fig. S2** Langmuir model of MB in  $\text{TpBd}-(\text{SO}_3)_2$  and  $\text{ImI@TpBd}-(\text{SO}_3)_2$



**Table S5** Comparison of cationic dyes adsorption

| Materials                                                                              | $q_e$ (mg g <sup>-1</sup> )                                                | Ref       |
|----------------------------------------------------------------------------------------|----------------------------------------------------------------------------|-----------|
| KOH-activated carbon from sucrose                                                      | MB 704.2                                                                   | S1        |
| Sulfuric acid activated (RHS) activated rice husk carbon                               | CV 64.9                                                                    | S2        |
| Magnetic nanocomposite beads comprising carboxylic acid functionalized carbon nanotube | MB 465.5; Direct red 380.7                                                 | S3        |
| Fe <sub>3</sub> O <sub>4</sub> @polydopamine-Ag hollow microspheres                    | MB 102.0                                                                   | S4        |
| EDTA-Cross-Linked $\beta$ -Cyclodextrin                                                | MB 88.5; CV 114                                                            | S5        |
| Aminocarboxylate/maleic acid resin                                                     | MB 2101; Hg(II) 263                                                        | S6        |
| Bakelite-type anionic microporous organic polymers                                     | MB 712.2; MG 593.6                                                         | S7        |
| Magnetic graphene oxide modified zeolite                                               | MB 97.3                                                                    | S8        |
| Poly (NIPAAm/AA/N-allylisatin) nanohydrogel                                            | MB 392.2; AO 337.8; BO 961.5                                               | S9        |
| Magnetic polyacrylamide microspheres                                                   | MB 1990; GV 1850; BR 1937                                                  | S10       |
| ImI@TpBd-(SO <sub>3</sub> ) <sub>2</sub>                                               | MB 2865.3; AZB 1015; BBR 974.1; AZC 936.3; AZA, AO, CV, BR, BO 597.9-763.1 | This work |

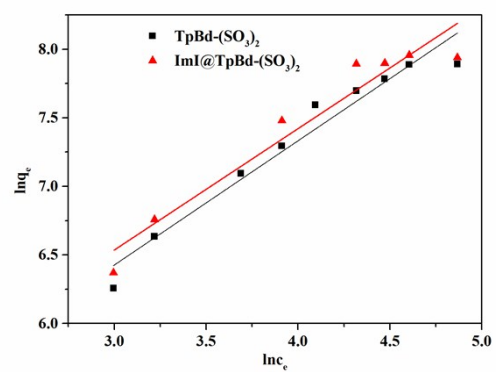

**Fig. S3** Freundlich model of MB in  $\text{TpBd}-(\text{SO}_3)_2$  and  $\text{ImI@TpBd}-(\text{SO}_3)_2$

**Table S6** Freundlich model constants and correlation coefficient

| Materials                                | Freundlich model            |       |                                         |        |
|------------------------------------------|-----------------------------|-------|-----------------------------------------|--------|
|                                          | $K_F$ (mg g <sup>-1</sup> ) | $b_F$ | $q_e(\text{cal})$ (mg g <sup>-1</sup> ) | $R^2$  |
| TpBd-(SO <sub>3</sub> ) <sub>2</sub>     | 40.703                      | 0.906 | 2641.2                                  | 0.9496 |
| ImI@TpBd-(SO <sub>3</sub> ) <sub>2</sub> | 48.444                      | 0.885 | 2854.9                                  | 0.9297 |

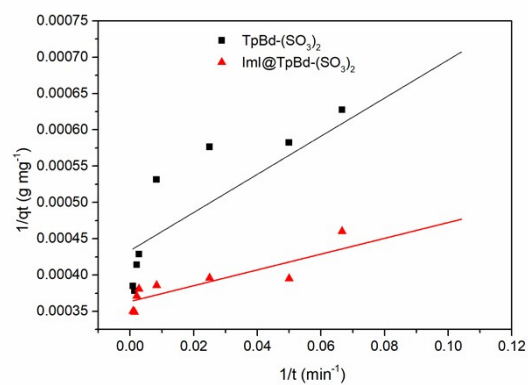

**Fig. S4** Pseudo-first-order model of MB in TpBd-(SO<sub>3</sub>)<sub>2</sub> and ImI@TpBd-(SO<sub>3</sub>)<sub>2</sub>

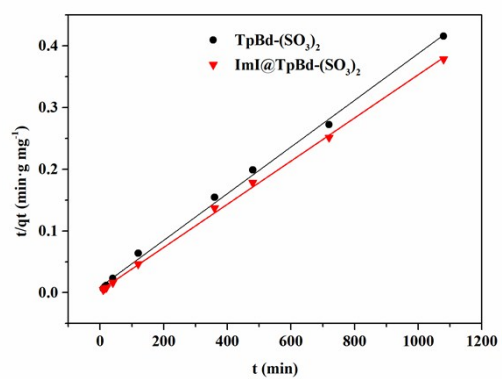

**Fig. S5** Pseudo-second-order model of MB in TpBd-(SO<sub>3</sub>)<sub>2</sub> and ImI@TpBd-(SO<sub>3</sub>)<sub>2</sub>

**Table S7** Comparison of kinetic model parameters of TpBd-(SO<sub>3</sub>)<sub>2</sub> and ImI@TpBd-(SO<sub>3</sub>)<sub>2</sub>

| Type                         | Parameter                                              | TpBd-(SO <sub>3</sub> ) <sub>2</sub> | ImI@TpBd-(SO <sub>3</sub> ) <sub>2</sub> |
|------------------------------|--------------------------------------------------------|--------------------------------------|------------------------------------------|
| Pseudo-first-order kinetics  | q <sub>e</sub> (mg g <sup>-1</sup> )                   | 2307.4                               | 2748.7                                   |
|                              | k <sub>1</sub> (min <sup>-1</sup> )                    | 6.068                                | 2.996                                    |
|                              | R <sup>2</sup>                                         | 0.7492                               | 0.8449                                   |
| Pseudo-second-order kinetics | q <sub>e,exp</sub> (mg g <sup>-1</sup> )               | 2645.0                               | 2873.2                                   |
|                              | q <sub>e</sub> (mg g <sup>-1</sup> )                   | 2627.0                               | 2866.2                                   |
|                              | k <sub>2</sub> (g mg <sup>-1</sup> min <sup>-1</sup> ) | 1.6227×10 <sup>-5</sup>              | 3.493×10 <sup>-5</sup>                   |
|                              | R <sup>2</sup>                                         | 0.9971                               | 0.9988                                   |

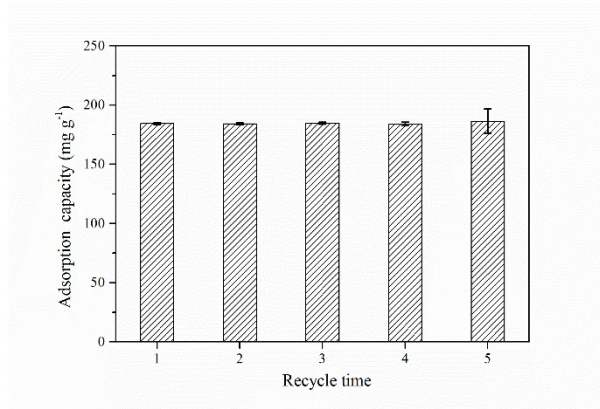

**Fig. S6** Recycle studies of MB adsorption in ImI@TpBd-(SO<sub>3</sub>)<sub>2</sub>

### S3. References

- [1] K. C. Bedin, A. C. Martins, A. L. Cazetta, O. Pezoti, V. C. Almeida, KOH-activated carbon prepared from sucrose spherical carbon: adsorption equilibrium, kinetic and thermodynamic studies for methylene blue removal, *Chem. Eng. J.* 286 (2016) 476-484.
- [2] K. Mohanty, J.T. Naidu, B.C. Meikap, M. N. Biswas, Removal of crystal violet from wastewater by activated carbons prepared from rice husk, *Ind. Eng. Chem. Res.* 45 (2006) 5165-5171.
- [3] S. Saber-Samandari, S. Saber-Samandari, H. Joneidi-Yekta, M. Mohseni, Adsorption of anionic and cationic dyes from aqueous solution using gelatin-based magnetic nanocomposite beads comprising carboxylic acid functionalized carbon nanotube, *Chem. Eng. J.* 308 (2017) 1133-1144.
- [4] K. Cui, B. Yan, Y. Xie, H. Qian, X. Wang, Q. Huang, Y. He, S. Jin, H. Zeng, Regenerable urchin-like  $\text{Fe}_3\text{O}_4@\text{PDA-Ag}$  hollow microspheres as catalyst and adsorbent for enhanced removal of organic dyes, *J. Hazard. Mater.* 350 (2018) 66-75.
- [5] F. Zhao, E. Repo, D. Yin, Y. Meng, S. Jafari, M. Sillanpää, EDTA-Cross-Linked  $\beta$ -Cyclodextrin: An Environmentally Friendly Bifunctional Adsorbent for Simultaneous Adsorption of Metals and Cationic Dyes, *Environ. Sci. Technol.* 49 (2015) 10570-10580.
- [6] S.A. Ali, I.Y. Yaagoob, M.A.J. Mazumder, H. A. Al-Muallem, Fast removal of methylene blue and Hg(II) from aqueous solution using a novel super-adsorbent containing residues of glycine and maleic acid, *J. Hazard. Mater.* 369 (2019) 642-654.
- [7] B Wang, Q Zhang, G Xiong, F Ding, Y He, B Ren, L. You, X. Fan, C. Hardacre, Y. Sun, Bakelite-type anionic microporous organic polymers with high capacity



for selective adsorption of cationic dyes from water, *Chem. Eng. J.* 366 (2019) 404-414.

[8] T. Huang, M. Yan, K. He, Z. Huang, G. Zeng, A. Chen, M. Peng, H. Li, L. Yuan, G. Chen, Efficient removal of methylene blue from aqueous solutions using magnetic graphene oxide modified zeolite, *J. Colloid Interface Sci.* 543 (2019) 43-51.

[9] Viran P. Mahida, Manish P. Patel, Removal of some most hazardous cationic dyes using novel poly (NIPAAm/AA/N-allylisatin) nanohydrogel, *Arab. J. Chem.* (2016) 9 430-442.

[10] T. Yao, S. Guo, C. Zeng, C. Wang, L. Zhang, Investigation on efficient adsorption of cationic dyes on porous magnetic polyacrylamide microspheres, *J. Hazard. Mater.* 292 (2015) 90-97.
